# Supplementary material
Source: Springer Nature journal article supplement (https://www.springermedizin.de/resource/supplementary/12911_2012_613_MOESM2_ESM.pdf/9525910)
Supplement: MOESM2 [file 9525910]

## Foundational Research

- Conducted 20 focus groups, a selective review of qualitative studies by other investigators, and systematic literature reviews to identify patients' and families' concerns and informational needs regarding renal replacement therapy

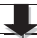

### Video Development (17 total iterations)

#### Stage 1 (26 months, 11 script iterations)

- Multidisciplinary team of experts developed a preliminary structure for the video and handbook to ensure their complementary nature and attention to seven key content areas
- Selected a diverse group of patients receiving different renal replacement therapies, their family members, and health care professionals for potential participation in the video
- Conducted directed interviews to acquire patient and family member testimonials regarding their treatment experiences and draft an initial video script

#### Stage 2 (12 months, 3 video iterations)

- Filmed patient, family member, and provider testimonials addressing seven key content areas
- Edited the video
- Produced a video draft suitable for screening

#### Stage 3 (4 months, 3 video iterations)

- Screened a video draft to obtain qualitative feedback from patients and family members (12 participants total)
- Produced a final version of the video

### Handbook Development (26 total iterations)

#### Stage 1 (12 months, 3 iterations)

- Multidisciplinary team of experts developed a preliminary structure for the video and handbook to ensure their complementary nature and attention to seven key content areas
- Worked with a medical illustrator, adult education specialist, communications specialist, and a literacy expert to establish a preliminary standard format for presenting scientific information to patients

#### Stage 2 (15 months, 22 iterations)

- Performed a two-phase mixed-methods study

##### *Phase 1, 16 iterations*

- Conducted cognitive interviews with 12 patients to obtain critical feedback regarding the understandability of information presented and identify areas for improvement

##### *Phase 2, 6 iterations*

- Performed an additional 36 cognitive interviews to obtain quantitative measures of comprehension and qualitative input on the presentation of information

#### Stage 3 (2 months, 1 iteration)

- Screened a handbook draft to obtain qualitative feedback from patients and family members (12 participants total)
- Produced a final version of the handbook
